# Supplementary material for: Nitrogen and sulfur self-doped porous carbon from brussel sprouts as electrode materials for high stable supercapacitors
Source: Royal Society of Chemistry journal article supplement (doi:10.1039/c6ra08428a), 2016-01-01
Supplement: c6ra08428a1.pdf [file c6ra08428a1.pdf]

**Nitrogen and sulfur self-doped porous carbon from brussel sprouts as electrode material for high stable supercapacitors**

Jiangfeng Li <sup>a</sup>, Guangtao Zan <sup>a, b</sup>, Qingsheng Wu <sup>\*a, b</sup>

<sup>a</sup> Department of Chemistry, Tongji University, Shanghai 200092, PR China.

<sup>b</sup> School of Materials Science and Engineering, Tongji University, Shanghai 200092, PR China

\* Corresponding author. Tel: +86 21 65982620, Fax: +86 21 65981097. *E-mail address*:

qswu@tongji.edu.cn (Q. Wu).

Table S1 Elements of the freeze dried brussel sprouts determined by EDS (wt %).

| Element    | C     | N     | O     | S    | Mg   | Al   | P    | K   |
|------------|-------|-------|-------|------|------|------|------|-----|
| Sample (%) | 44.83 | 10.19 | 43.28 | 0.38 | 0.14 | 0.37 | 0.21 | 0.6 |

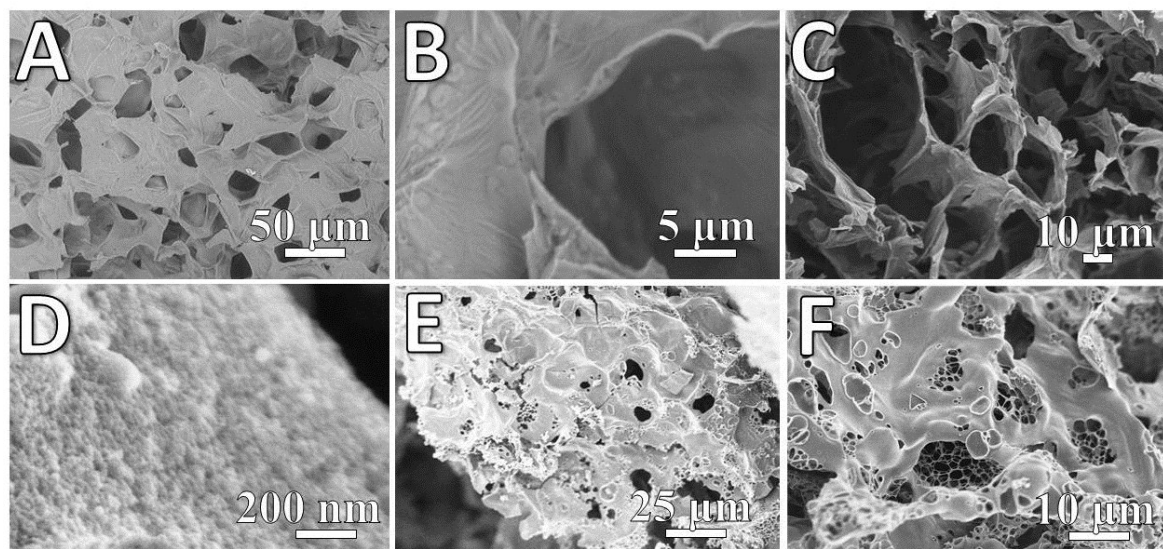

Fig. S1 (A, B) SEM images of the surface morphology and structure of freeze-dried brussel sprouts; (C, D) FESEM images of carbon material derived from brussel sprouts carbonized at 800 °C for 2 h without KOH-pretreated; (E, F) FESEM images of carbon material derived from brussel sprouts carbonized and KOH activation at 700 °C and 900 °C, respectively.

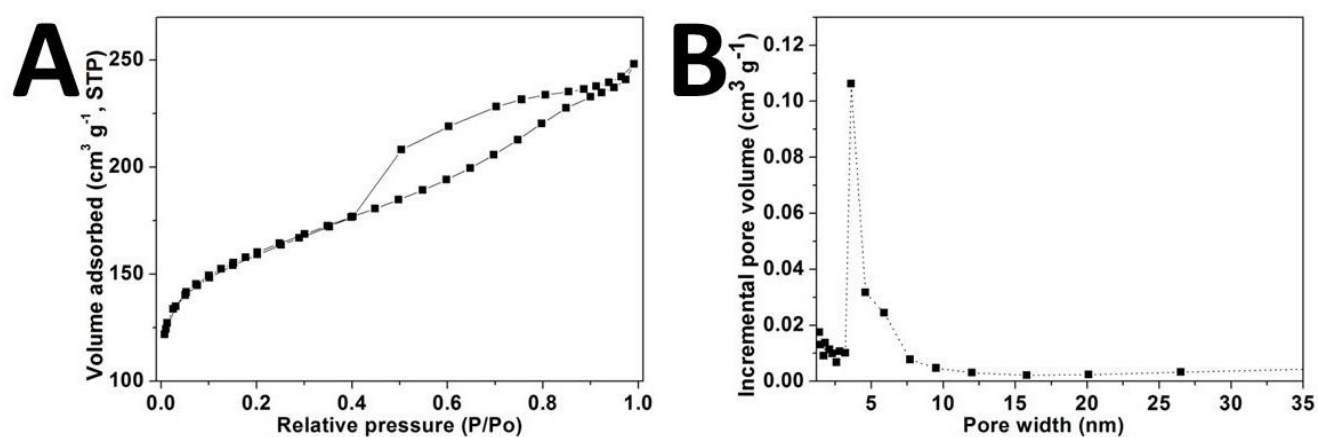

Fig. S2 (A) Nitrogen sorption isotherms and (B) pore size distribution of BSC.

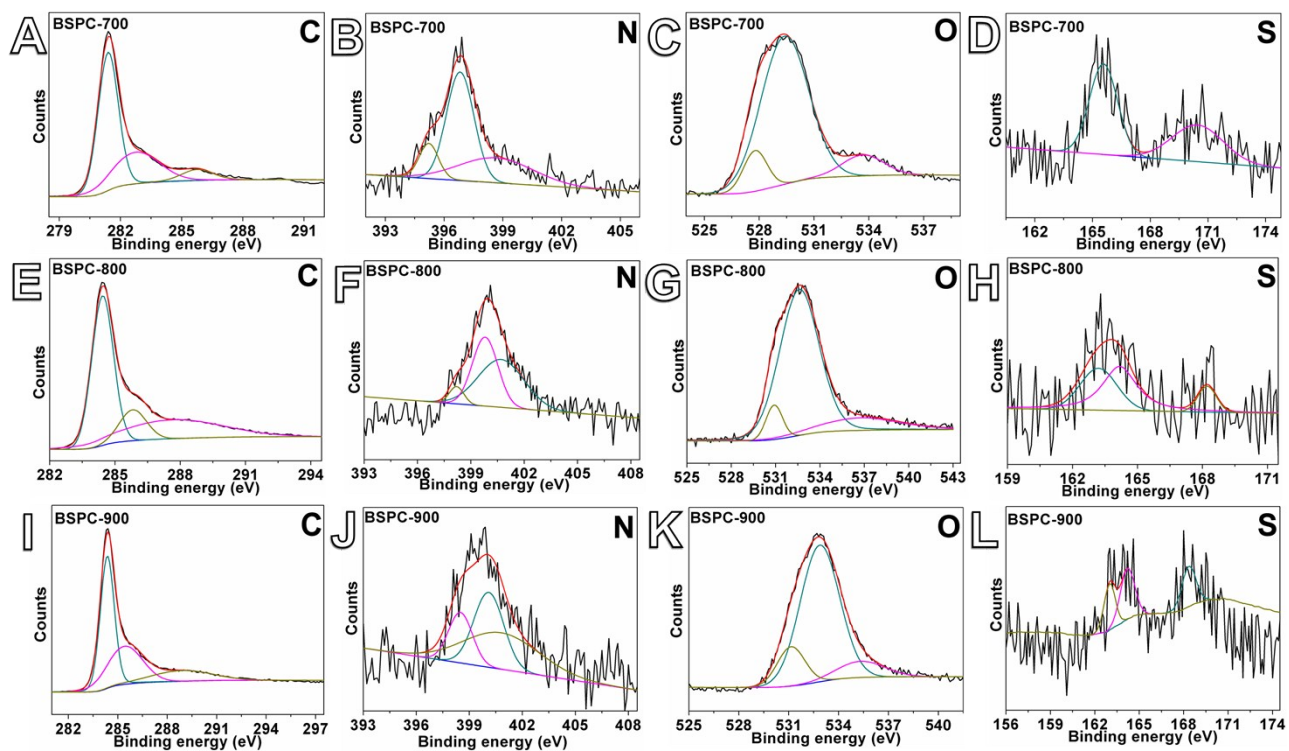

Fig. S3 XPS scans for C1s, N1s, O1s, and S2p orbitals of BSPCs.
